# Supplementary material for: Cyclodextrin complexation of a stilbene and the self-assembly of a simple molecular deviceElectronic Supplementary Information (ESI) available: NMR spectra. See http://www.rsc.org/suppdata/ob/b3/b310519a/
Source: Royal Society of Chemistry journal article supplement (doi:10.1039/b310519a), 2004-01-01
Supplement: b310519a.doc [file b310519a.doc]

# Electronic Supplementary Information

# Cyclodextrin complexation of a stilbene and the self-assembly of a molecular device

**Julia S. Lock,*a* Bruce L. May,*a* Philip Clements,*a* Stephen F. Lincoln**a* and Christopher J. Easton*b***

*a* *Department of Chemistry, University of Adelaide, Adelaide, SA 5005, Australia.*

*E-mail:Stephen.Lincoln@adelaide.edu.au*

*b Research School of Chemistry, Australian National University, Canberra, ACT 0200, Australia*

**Fig. S1**. Expanded region of the spectrum shown in Fig. 2.

**Fig. S2.** Representative variable temperature 1H NMR (600 MHz) spectra of the aromatic protons of *E*-**1**- in CD·*E*-**1**- showing their assignments (the spectra are not plotted to a constant vertical scale)

**Fig. S3**. Expanded region of the spectrum shown in Fig. 7.

**Fig. S4**. Expanded region of the spectrum shown in Fig. 7. The cross-peaks enclosed in the smaller and larger rectangles arise from dipolar interactions in **2***Z*-**1**-**4**- between the protons of **4**- and *Z*-**1**- with **2**, respectively.
